# Supplementary material
Source: MDPI journal article supplement (https://www.mdpi.com/2071-1050/14/14/8443)
Supplement: s1 [file s1]

# SUPPLEMENTARY MATERIAL FOR

## **Aging passenger car fleet structure, dynamics and environmental performance evaluation at regional level by life cycle assessment**

**George Barjoveanu, Florenta Dinita and Carmen Teodosiu \***

Department of Environmental Engineering and Management, "Cristofor Simionescu"  
Faculty of Chemical Engineering and Environmental Protection, "Gheorghe Asachi"  
Technical University of Iasi, 73 Bd. Mangeron, 700050, Iasi, Romania; gb@tuiasi.ro  
(G.B.); dinitaflorenta1992@yahoo.com (F.D.); cteo@ch.tuiasi.ro  
(C.T.)

\* Correspondence: cteo@ch.tuiasi.ro

Contents:

**Table S1.** Passenger car use inventory – urban scenario, hot emission, off peak operation

**Table S2.** Iasi County Passenger car fleet evolution

**Table S3.** Iasi county car fleet age dynamics

**Table S4.** Iasi County passenger cars distribution by type of fuel

Figure S1. Environmental profile of a 1 km urban drive of a EURO 4 petrol passenger car

Figure S2. Environmental profile of a 1 km urban drive of a EURO 4 diesel passenger car

Figure S3. Environmental profile of a 1 km urban drive of a EURO 5 hybrid passenger car

Figure S4. Environmental profile of a 1 km urban drive of an all electric passenger car

**Table S1.** Passenger car use inventory – urban scenario, hot emission, off peak operation

| Pollution class      | Unit  | Petrol engines |          |          |          |          |          |          | Diesel engines |          |          |          |          |          |          |
|----------------------|-------|----------------|----------|----------|----------|----------|----------|----------|----------------|----------|----------|----------|----------|----------|----------|
|                      |       | NON<br>EURO    | EURO 1   | EURO 2   | EURO 3   | EURO 4   | EURO 5   | EURO 6   | NON<br>EURO    | EURO 1   | EURO 2   | EURO 3   | EURO 4   | EURO 5   | EURO 6   |
| INPUTS               |       |                |          |          |          |          |          |          |                |          |          |          |          |          |          |
| Energy consumption   | MJ/km | 4.4575         | 2.9178   | 3.1047   | 3.0190   | 3.2274   | 3.2274   | 3.2274   | 3.5841         | 2.8508   | 3.0493   | 2.7771   | 2.7771   | 2.7771   | 2.7771   |
| Fuel consumption     | kg/km | 0.1042         | 0.0682   | 0.0726   | 0.0706   | 0.0755   | 0.0755   | 0.0755   | 0.1044         | 0.0683   | 0.0727   | 0.0707   | 0.0756   | 0.0756   | 0.0756   |
| OUTPUTS              |       |                |          |          |          |          |          |          |                |          |          |          |          |          |          |
| Carbon monoxide      | g/km  | 41.2378        | 2.8782   | 1.0235   | 0.4814   | 0.1591   | 0.2497   | 0.2383   | 0.9393         | 0.6383   | 0.5656   | 0.1767   | 0.1900   | 0.0569   | 0.0221   |
| Carbon Dioxide       | g/km  | 321.79         | 210.64   | 224.13   | 217.94   | 232.99   | 232.99   | 232.99   | 266.48         | 211.96   | 226.72   | 206.48   | 206.48   | 206.48   | 206.48   |
| Methane              | g/km  | 0.0929         | 0.0184   | 0.0121   | 0.0021   | 0.0020   | 0.0020   | 0.0020   | 0.0199         | 0.0078   | 0.0050   | 0.0021   | 0.0008   | 0.0001   | 0.0001   |
| Sulfur Dioxide       | g/km  | 0.0020         | 0.0013   | 0.0014   | 0.0013   | 0.0014   | 0.0014   | 0.0014   | 0.0016         | 0.0012   | 0.0013   | 0.0012   | 0.0012   | 0.0012   | 0.0012   |
| NOx                  | g/km  | 1.4297         | 0.3399   | 0.2058   | 0.0826   | 0.0789   | 0.0401   | 0.0401   | 0.6963         | 0.9043   | 0.9865   | 0.9232   | 0.7785   | 0.7324   | 0.0644   |
| NO <sub>2</sub>      | g/km  | 0.0572         | 0.0136   | 0.0082   | 0.0025   | 0.0024   | 0.0012   | 0.0008   | 0.0766         | 0.0995   | 0.1085   | 0.2308   | 0.4282   | 0.2929   | 0.0129   |
| NO                   | g/km  | 1.3725         | 0.3263   | 0.1976   | 0.0801   | 0.0765   | 0.0389   | 0.0393   | 0.6197         | 0.8048   | 0.8780   | 0.6924   | 0.3503   | 0.4394   | 0.0515   |
| Dinitrous Oxide      | g/km  | 0.0071         | 0.0185   | 0.0092   | 0.0012   | 0.0015   | 0.0018   | 0.0018   | 0.0000         | 0.0014   | 0.0028   | 0.0064   | 0.0064   | 0.0064   | 0.0078   |
| Particulates, PM 2.5 | g/km  | 0.0008         | 0.0004   | 0.0001   | 0.0005   | 0.0004   | 0.0007   | 0.0003   | 0.2726         | 0.0689   | 0.0562   | 0.0366   | 0.0360   | 0.0001   | 0.0001   |
|                      |       |                |          |          |          |          |          |          |                |          |          |          |          |          |          |
| Lead                 | mg/km | 0.000166       | 0.000109 | 0.000116 | 0.000112 | 0.000120 | 0.000120 | 0.000120 | 0.000042       | 0.000034 | 0.000036 | 0.000033 | 0.000033 | 0.000033 | 0.000033 |
| Nickel               | mg/km | 0.000239       | 0.000156 | 0.000166 | 0.000162 | 0.000173 | 0.000173 | 0.000173 | 0.000017       | 0.000013 | 0.000014 | 0.000013 | 0.000013 | 0.000013 | 0.000013 |
| Zinc                 | mg/km | 0.003422       | 0.002240 | 0.002384 | 0.002318 | 0.002478 | 0.002478 | 0.002478 | 0.001525       | 0.001213 | 0.001298 | 0.001182 | 0.001182 | 0.001182 | 0.001182 |
| Selenium             | mg/km | 0.000021       | 0.000014 | 0.000014 | 0.000014 | 0.000015 | 0.000015 | 0.000015 | 0.000008       | 0.000007 | 0.000007 | 0.000007 | 0.000007 | 0.000007 | 0.000007 |
| Mercury              | mg/km | 0.000902       | 0.000591 | 0.000628 | 0.000611 | 0.000653 | 0.000653 | 0.000653 | 0.000449       | 0.000357 | 0.000382 | 0.000348 | 0.000348 | 0.000348 | 0.000348 |
| Chromium             | mg/km | 0.000653       | 0.000428 | 0.000455 | 0.000442 | 0.000473 | 0.000473 | 0.000473 | 0.000720       | 0.000573 | 0.000613 | 0.000558 | 0.000558 | 0.000558 | 0.000558 |
| Arsenic              | mg/km | 0.000031       | 0.000020 | 0.000022 | 0.000021 | 0.000023 | 0.000023 | 0.000023 | 0.000008       | 0.000007 | 0.000007 | 0.000007 | 0.000007 | 0.000007 | 0.000007 |
| Cadmium              | mg/km | 0.000021       | 0.000014 | 0.000014 | 0.000014 | 0.000015 | 0.000015 | 0.000015 | 0.000004       | 0.000003 | 0.000004 | 0.000003 | 0.000003 | 0.000003 | 0.000003 |
|                      |       |                |          |          |          |          |          |          |                |          |          |          |          |          |          |
| VOCs                 | g/km  | 3.7487         | 0.2959   | 0.1309   | 0.0238   | 0.0115   | 0.0079   | 0.0079   | 0.2838         | 0.0838   | 0.0590   | 0.0323   | 0.0250   | 0.0017   | 0.0016   |
| NMVOCS               | g/km  | 3.6558         | 0.2775   | 0.1189   | 0.0217   | 0.0094   | 0.0059   | 0.0059   | 0.2640         | 0.0760   | 0.0541   | 0.0302   | 0.0242   | 0.0016   | 0.0015   |

**Table S2.** Iasi County Passenger car fleet evolution

| Year | Romania*  |           | Iasi*         |         | EU27**    |               |
|------|-----------|-----------|---------------|---------|-----------|---------------|
|      | No.       | Change, % | Cars/1000 ppl | no.     | Change, % | Cars/1000 ppl |
| 2006 | 3,220,682 | -         | 152           | 71,596  | -         | 88            |
| 2007 | 3,554,404 | 10.36%    | 172           | 79,877  | 11.57%    | 99            |
| 2008 | 4,027,367 | 13.31%    | 197           | 91,365  | 14.38%    | 114           |
| 2009 | 4,244,922 | 5.40%     | 209           | 100,148 | 9.61%     | 126           |
| 2010 | 4,319,701 | 1.76%     | 214           | 106,086 | 5.93%     | 135           |
| 2011 | 4,334,547 | 0.34%     | 216           | 111,118 | 4.74%     | 117           |
| 2012 | 4,487,251 | 3.52%     | 224           | 117,850 | 6.06%     | 152           |
| 2013 | 4,695,660 | 4.64%     | 235           | 124,985 | 6.05%     | 161           |
| 2014 | 4,907,564 | 4.51%     | 247           | 132,451 | 5.97%     | 169           |
| 2015 | 5,155,059 | 5.04%     | 261           | 140,898 | 6.38%     | 179           |
| 2016 | 5,472,423 | 6.16%     | 279           | 151,032 | 7.19%     | 192           |
| 2017 | 5,998,194 | 9.61%     | 307           | 164,595 | 8.98%     | 208           |
| 2018 | 6,452,536 | 7.57%     | 332           | 179,494 | 9.05%     | 227           |
| 2019 | 6,902,984 | 6.98%     | 357           | 193,205 | 7.64%     | 243           |
| 2020 | 7,274,728 | 5.39%     | 376           | 205,554 | 6.69%     | 260           |
|      |           |           |               |         | no data   | no data       |

Notes: \*% refer to change compared to the previous year; ppl- people

**Table S3.** Iasi county car fleet age dynamics

|       | Total   | 0—2 years |     | 3 - 5 years |     | 6—10 years |      | 11—15 years |      | 16—20 years |       | >20    |      |
|-------|---------|-----------|-----|-------------|-----|------------|------|-------------|------|-------------|-------|--------|------|
| Years |         | No.       | %   | No.         | %   | No.        | %    | No.         | %    | No.         | %     | No.    | %    |
| 2017  | 164,576 | 3952      | 2.4 | 5852        | 3.6 | 28,012     | 17.0 | 54,961      | 33.4 | 404,39      | 24.6% | 31,360 | 19.1 |
| 2018  | 179,475 | 5165      | 2.9 | 7189        | 4.0 | 23,217     | 12.9 | 62,354      | 34.7 | 46,827      | 26.1% | 34,723 | 19.3 |
| 2019  | 193,187 | 7027      | 3.6 | 8459        | 4.4 | 23,236     | 12.0 | 62,669      | 32.4 | 53,277      | 27.6% | 385,19 | 19.9 |
| 2020  | 205,554 | 10,179    | 5.0 | 9863        | 4.8 | 26,431     | 12.9 | 66,848      | 32.5 | 53,565      | 26.1% | 38,668 | 18.8 |
| 2021  | 218,315 | 5663      | 2.6 | 11943       | 5.5 | 24,343     | 11.2 | 55,419      | 25.4 | 64,291      | 29.4% | 56,656 | 26.0 |

\*% represents share of the total

**Table S4.** Iasi County passenger cars distribution by type of fuel

| Years | Total   | Petrol  |        | Diesel  |       | Hybrid |       | Electric |       |
|-------|---------|---------|--------|---------|-------|--------|-------|----------|-------|
| 2015  | 140,878 | 92,161  | 65.40% | 48,523  | 34.4% | 194    | 0.10% | 0        | 0     |
| 2016  | 151,013 | 95,540  | 63.30% | 55,187  | 36.5% | 284    | 0.20% | 2        | 0.00% |
| 2017  | 164,576 | 98,675  | 60.00% | 65,491  | 39.8% | 401    | 0.20% | 9        | 0.01% |
| 2018  | 179,475 | 101,654 | 56.60% | 77,199  | 43.0% | 602    | 0.30% | 20       | 0.01% |
| 2019  | 193,187 | 104,570 | 54.10% | 87,592  | 45.3% | 965    | 0.50% | 60       | 0.03% |
| 2020  | 205,554 | 106,567 | 51.80% | 97,257  | 47.3% | 1,576  | 0.80% | 154      | 0.07% |
| 2021  | 217,280 | 107,569 | 49.50% | 106,501 | 49.0% | 2,792  | 1.30% | 418      | 0.19% |

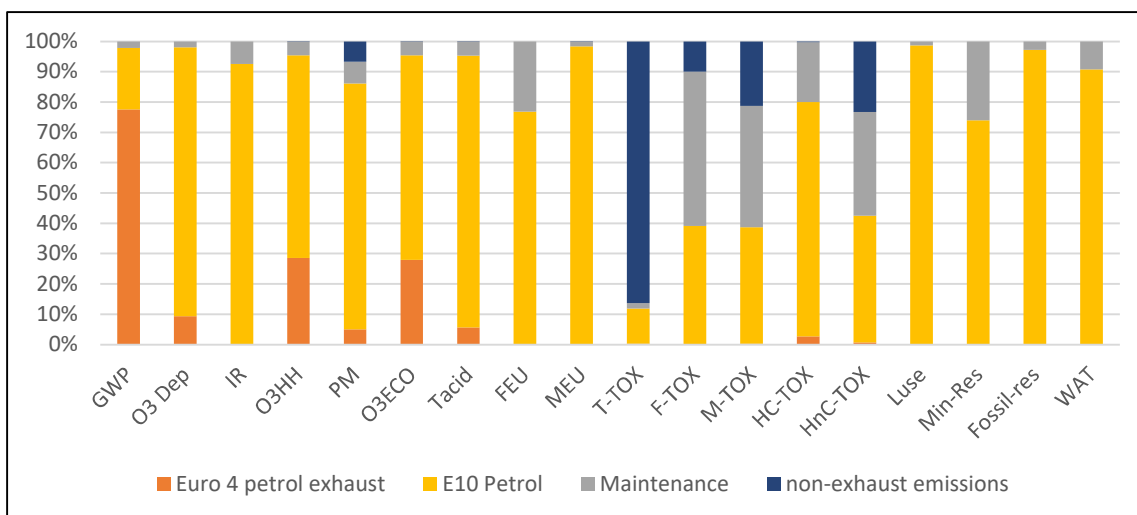

Figure S1. Environmental profile of a 1 km urban drive of a EURO 4 petrol passenger car

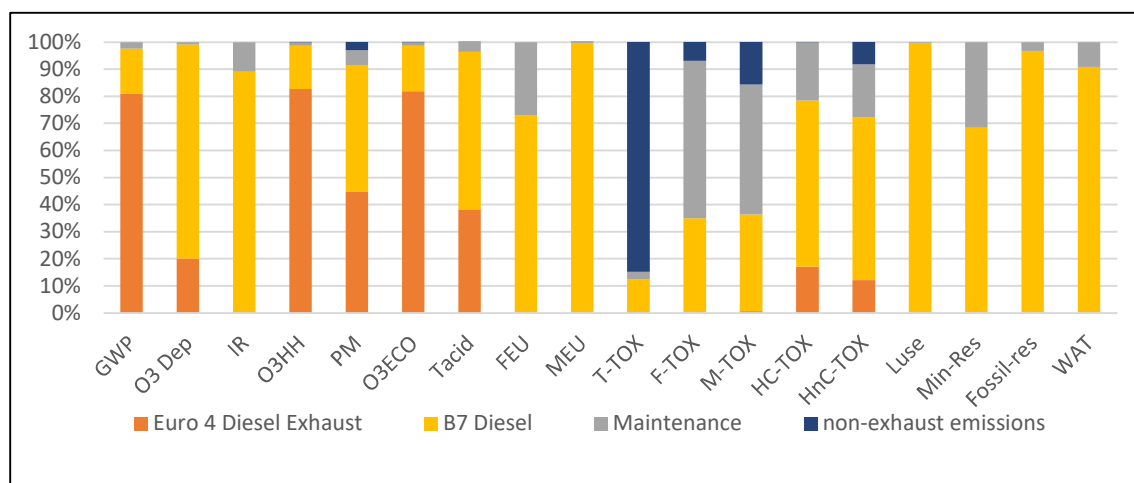

Figure S2. Environmental profile of a 1 km urban drive of a EURO 4 diesel passenger car

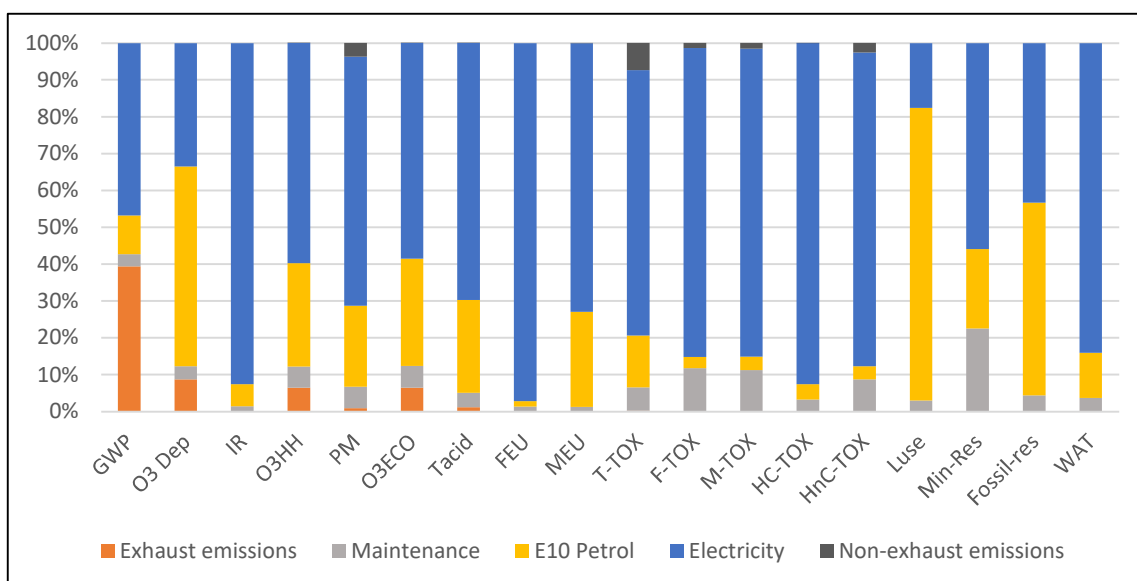

Figure S3. Environmental profile of a 1 km urban drive of a EURO 5 hybrid passenger car

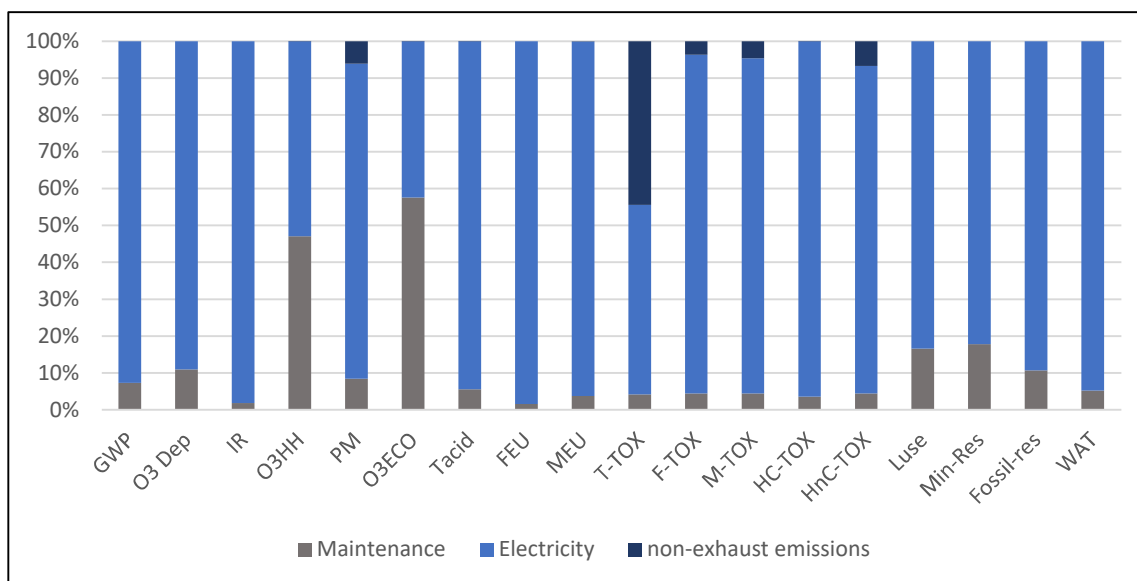

Figure S4. Environmental profile of a 1 km urban drive of an all electric passenger car
